# Supplementary material for: A toolbox of anti–mouse and anti–rabbit IgG secondary nanobodies
Source: PubMed Central journal article supplement (PMC5839796; doi:10.1083/jcb.201709115), 2018-03-05
Supplement: JCB_201709115_sm.pdf [file JCB_201709115_sm.pdf]

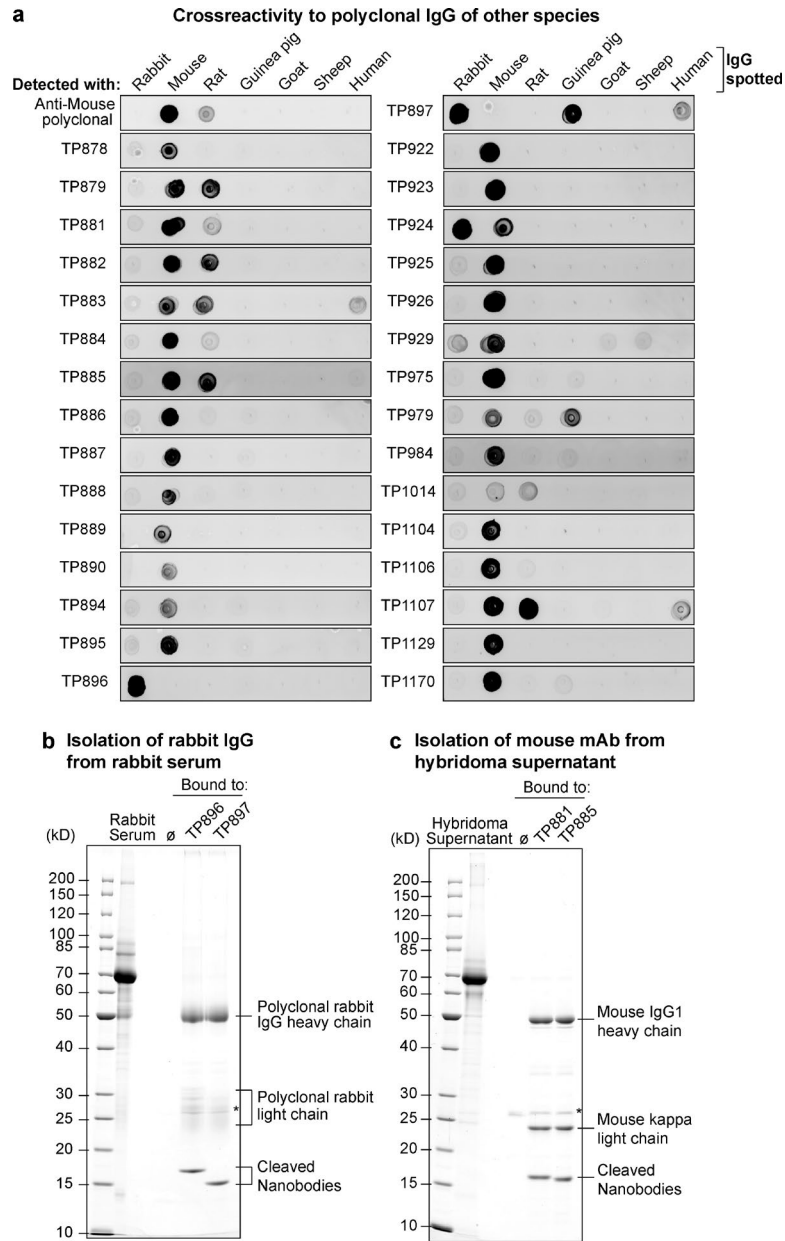

Figure S1. **Species cross reactivity profiling and native target IgG isolation.** (a) Cross reactivity profiling of all anti-IgG nanobodies. Using the same dot blot assay as described in Fig. 1 b, the cross reactivity of anti-IgG nanobodies to polyclonal IgG from the indicated species was determined. (b) Isolation of polyclonal rabbit IgG from rabbit serum. Anti-rabbit IgG nanobodies TP896 and TP897 carrying an N-terminal Avi-SUMOStar tag were biotinylated and immobilized on magnetic Streptavidin beads. After incubation with crude rabbit serum and washing, nanobody-bound polyclonal rabbit IgG was specifically eluted via SUMOStar protease cleavage in physiological buffer. Empty beads served as negative control. (c) Isolation of anti-Nup62 mouse IgG1  $\kappa$  mAb A225 from hybridoma supernatant with anti-mouse IgG1 nanobodies TP881 and TP885 as described in panel b. The asterisk indicates the SUMOStar protease used for elution.

**a HRP conjugation to anti-IgG1 Fc Nb TP1107**

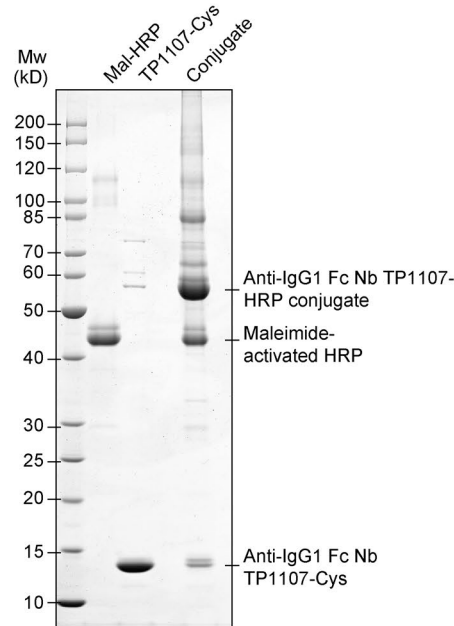

**b Uncropped Western blots with primary antibodies on Xenopus egg extract detected by HRP-conjugated:**

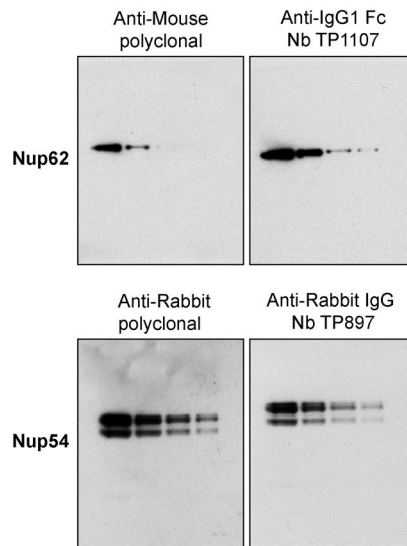

**c Comparison to commercially available anti-IgG nanobodies**

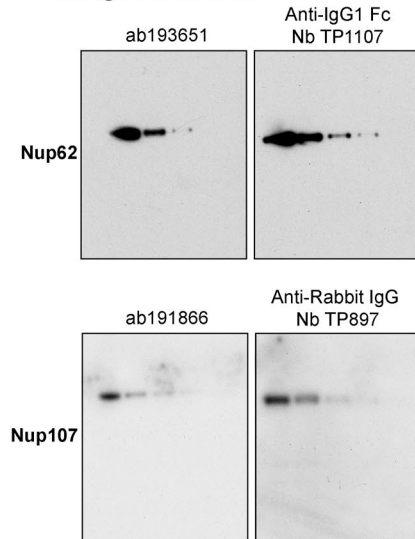

**d Expression of anti-IgG1 Fc Nb TP1107 fusion to ascorbate peroxidase APEX2**

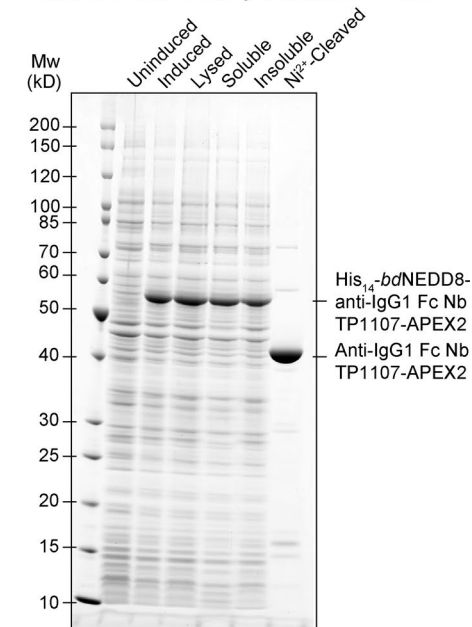

Figure S2. **Anti-IgG nanobody conjugation to HRP and fusion to APEX2.** (a) Anti-mouse IgG1 Fc nanobody TP1107 with a C-terminal cysteine was conjugated to maleimide-activated HRP by incubation of equimolar amounts for 1 h at room temperature. (b) Uncropped images of the Western blots shown in Fig. 2 a. Samples used for Western blots to compare the performance of polyclonal secondary antibodies and anti-IgG nanobodies were run on the same gel and blotted at the same time. The blots for a given primary antibody were developed under identical conditions in parallel. (c) A twofold dilution series of *Xenopus* egg extract was blotted on nitrocellulose and probed with an anti-Nup62 mouse IgG1 monoclonal antibody (top). It was then detected either via HRP-conjugated anti-mouse IgG1 nanobody ab193651 (1:3,500 dilution, ~5 nM; Abcam) or 5 nM HRP-anti-mouse IgG1 Fc nanobody TP1107. Bottom: A twofold dilution series of *Xenopus* egg extract was blotted on nitrocellulose and probed with a polyclonal rabbit antibody against Nup107. It was then detected either via HRP-conjugated anti-rabbit IgG nanobody ab191866 (1:3,500 dilution, ~5 nM; Abcam) or 5 nM HRP-anti-rabbit IgG nanobody TP897. (d) Expression of anti-mouse IgG1 Fc nanobody TP1107-APEX2 fusion in *E. coli*. After binding to nickel beads via the N-terminal His<sub>6</sub>-bdNEDD8-tag, untagged fusion protein was eluted by on-column bdNEDP1 cleavage (Frey and Görlich, 2014).

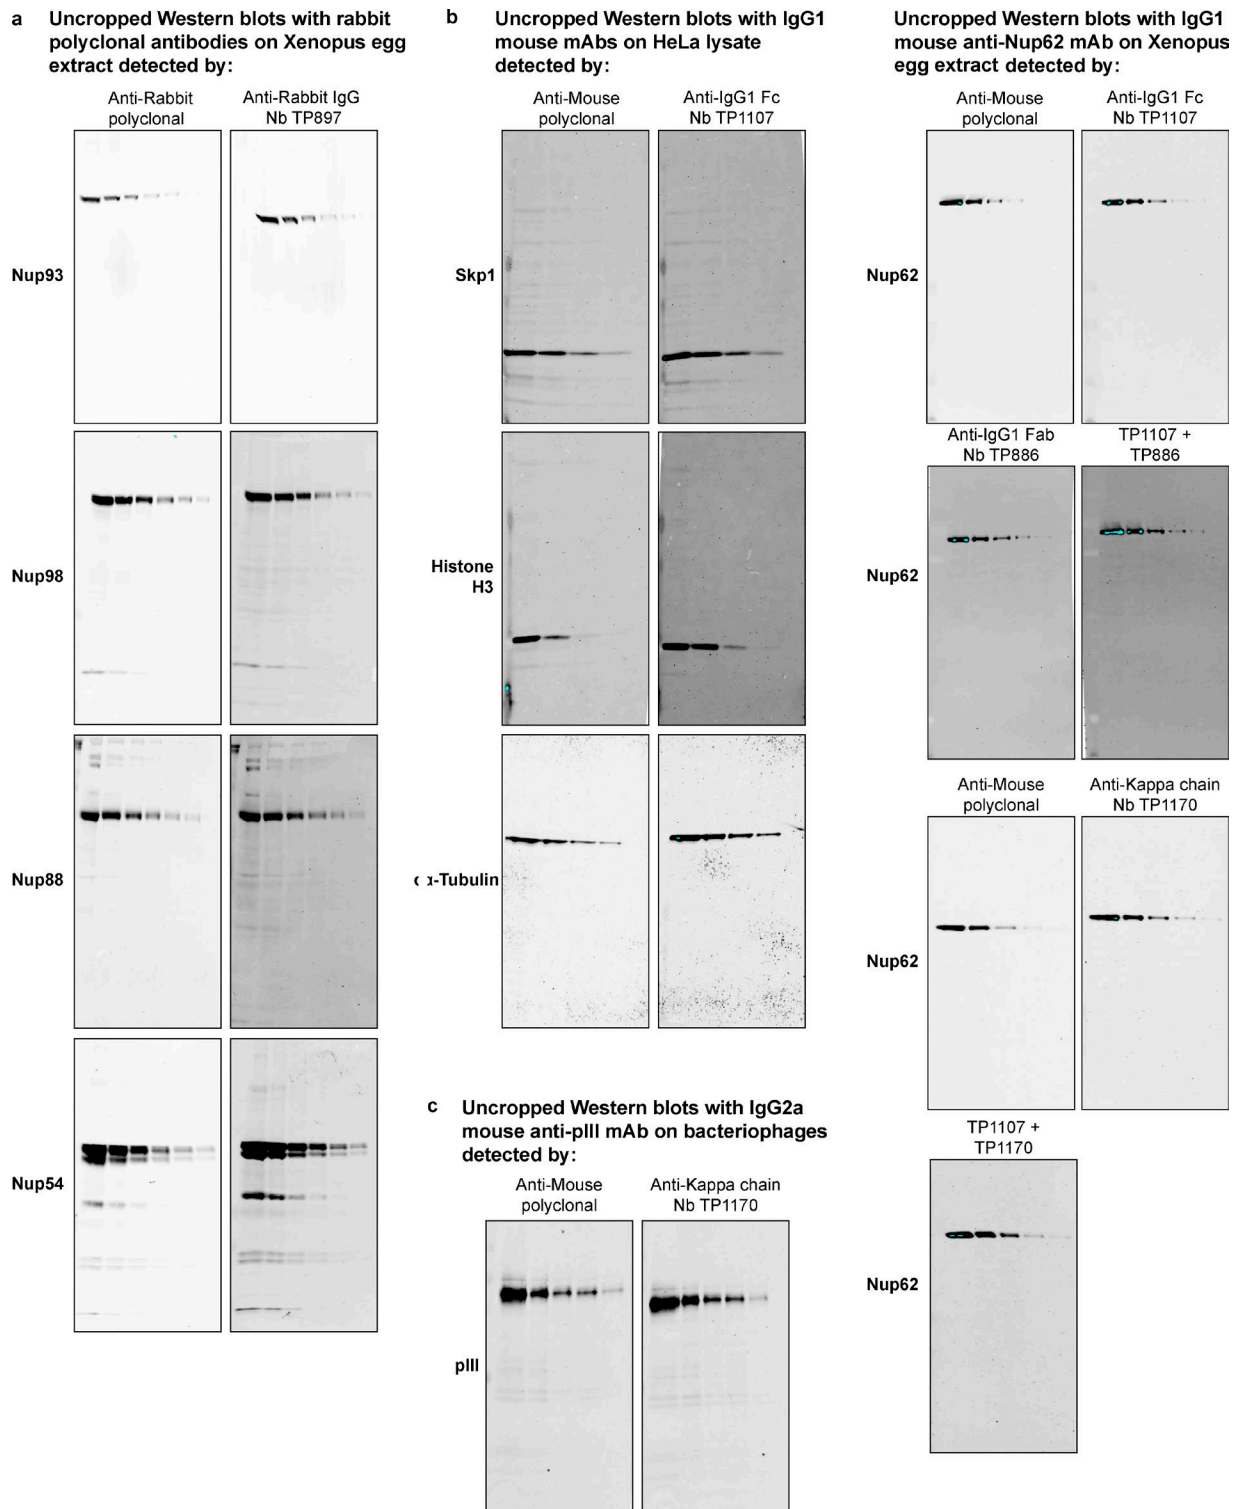

Figure S3. **Uncropped scans of the Western blots shown in Fig. 3.** (a-c) Samples used for Western blots to compare the performance of polyclonal secondary antibodies and anti-IgG nanobodies were run on the same gel and blotted at the same time. The blots for a given primary antibody were developed and scanned with identical settings in parallel. The molecular masses of the detected proteins are as follows: for each Nup, the molecular mass is part of its name; Skp1, 18.3 kD; Histone H3, 15.4 kD;  $\alpha$ -tubulin, 50.1 kD; bacteriophage minor coat protein III, 44.7 kD.

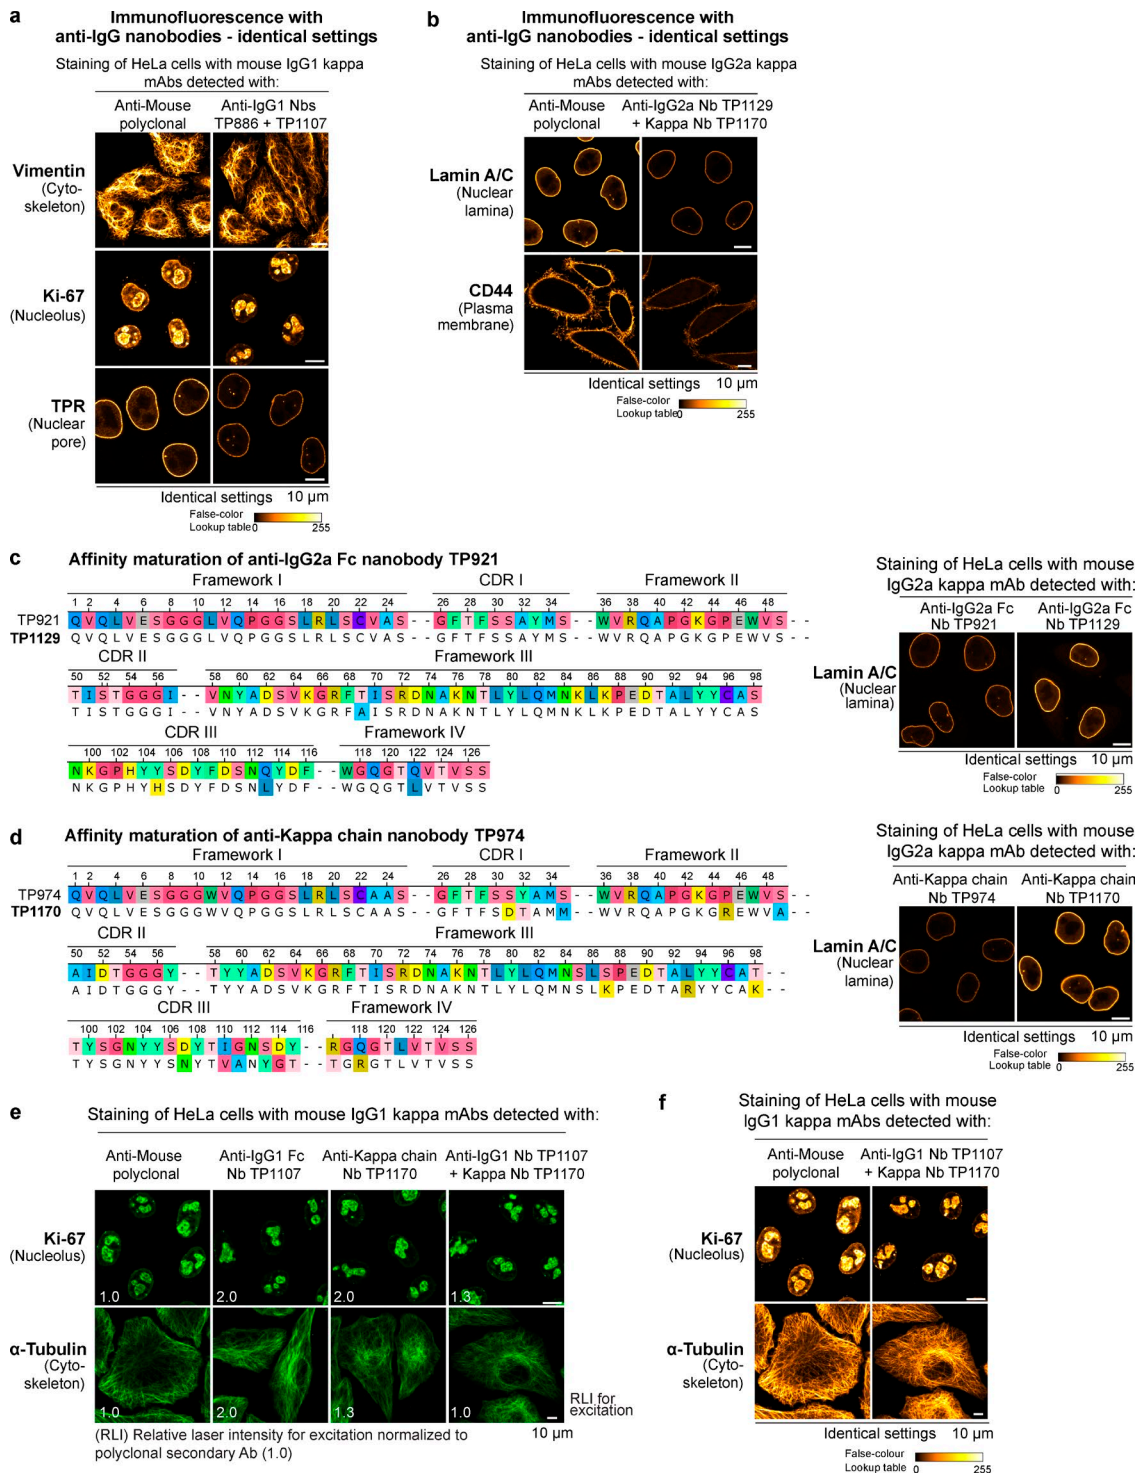

Figure S4. **Immunofluorescence with anti-mouse IgG nanobodies.** (a and b) Images for a given mAb or polyclonal antibody were acquired under identical settings, and pixel intensities are represented via a false-colored lookup table. (a) HeLa cells were stained with the indicated mouse IgG1 mAbs. These primary antibodies were then detected with Alexa Fluor 488-labeled goat anti-mouse polyclonal antibody or a combination of anti-mouse IgG1 Fab nanobody TP886 and anti-mouse IgG1 Fc nanobody TP1107. (b) HeLa cells were stained with the indicated mouse IgG2a mAbs. These primary antibodies were then detected with Alexa Fluor 488-labeled goat anti-mouse polyclonal antibody or a combination of anti-mouse IgG2a Fc nanobody TP1129 and anti-κ chain nanobody TP1170. (c) Protein sequence alignment of anti-mouse IgG2a nanobody TP921 and the variant TP1129 obtained after affinity maturation. HeLa cells were stained with a mouse IgG2a mAb targeting Lamin A/C. The mAb was detected via TP921 or TP1129 labeled with a single Alexa Fluor 488 dye, and the images were acquired under identical settings. (d) Protein sequence alignment of anti-mouse κ chain nanobody TP974 and the variant TP1170 obtained after DNA shuffling and affinity maturation. HeLa cells were stained with a mouse IgG2a mAb targeting Lamin A/C. The mAb was detected via TP974 or TP1170, both labeled with two Alexa Fluor 488 dyes. (e) HeLa cells were stained with the indicated mouse IgG1 κ mAbs. These primary antibodies were then detected with Alexa Fluor 647-labeled goat anti-mouse polyclonal antibody, anti-mouse IgG1 Fc nanobody TP1107, or anti-mouse κ chain nanobody TP1170. A combination of TP1107 and TP1170 yielded increased staining intensities; see panel f for identical settings scan. RLI, relative laser intensity (as defined in Fig. 4 A).

**Provided online is Table S1 in Excel, which lists anti-IgG nanobody protein sequences.**

## Reference

Frey, S., and D. Görlich. 2014. A new set of highly efficient, tag-cleaving proteases for purifying recombinant proteins. *J. Chromatogr. A.* 1337:95–105. <https://doi.org/10.1016/j.chroma.2014.02.029>
